# Supplementary material for: Bioremediation of Petroleum Hydrocarbons in Seawater: Prospects of Using Lyophilized Native Hydrocarbon-Degrading Bacteria
Source: MDPI journal article supplement (doi:10.3390/microorganisms9112285), 2021-11-03
Supplement: s1 [file s1]

Supplementary Materials

Manuscript Perdigão et al.

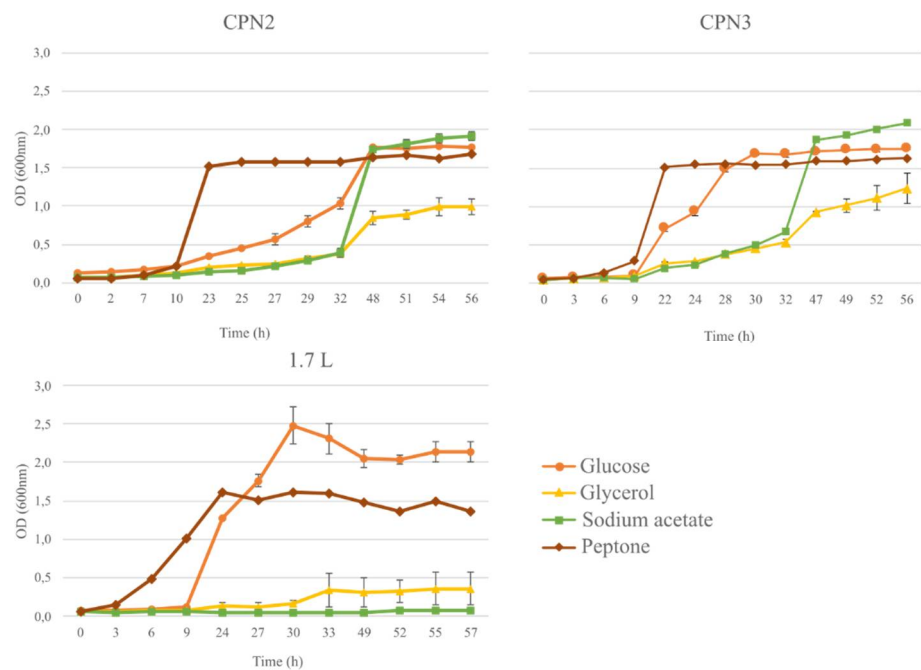

**Figure S1.** Biomass growth (mean value, standard deviation, n=3) of the bacterial isolates CPN2, CPN3 and 1.7 L with different carbon sources (10 g.L<sup>-1</sup>).

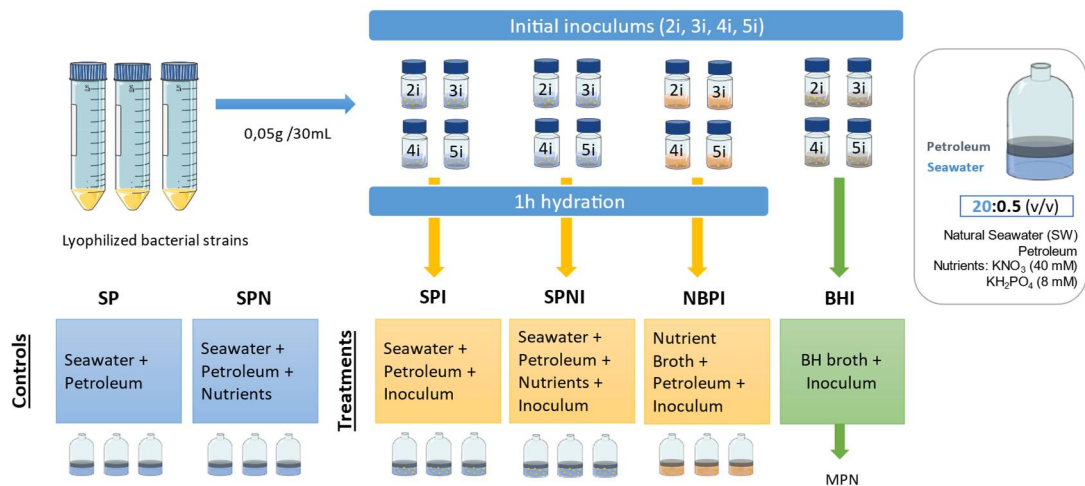

**Figure S2.** Representative scheme of the experiment with the lyophilized strains CPN2 (2i), CPN3 (3i), 1.7 L (4i) and a consortium (5i), in the controls SP (sterile seawater + petroleum), SPN (sterile seawater + petroleum + nutrients) and the treatments SPI (sterile seawater + petroleum + inoculum), SPNI (sterile seawater + petroleum + nutrients + inoculum), NBPI (nutrient broth + petroleum + inoculum) and BHI (bushnell-haas + inoculum).

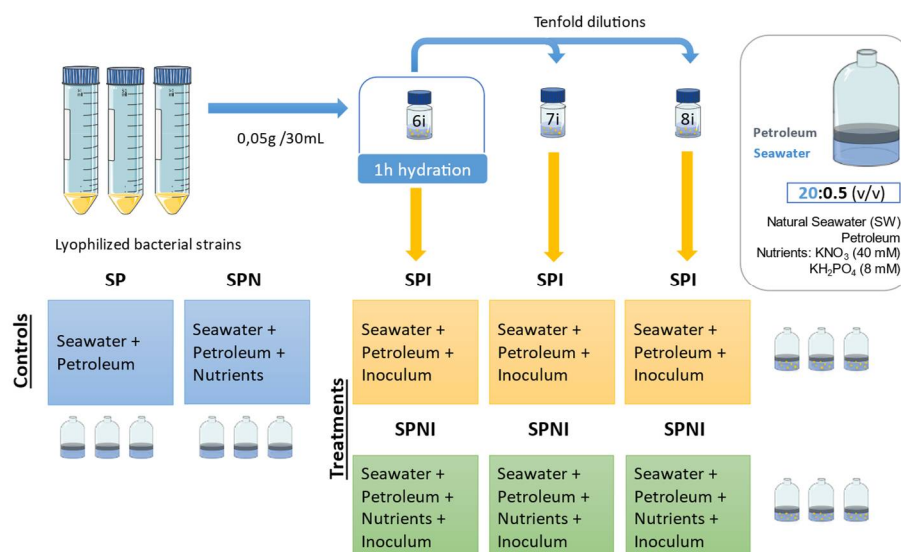

**Figure S3.** Representative scheme of the experiment with the controls SP (natural seawater + petroleum), SPN (natural seawater + petroleum + nutrients) and with different concentrations of the consortium of the lyophilized strain: 6i ( $1.7 \text{ g L}^{-1}$ ), 7i ( $1.7 \cdot 10^{-1} \text{ g L}^{-1}$ ) and 8i ( $1.7 \cdot 10^{-2} \text{ g L}^{-1}$ ), applied to the treatments SPI (natural seawater + petroleum + inoculum) and SPNI (natural seawater + petroleum + nutrients + inoculum).

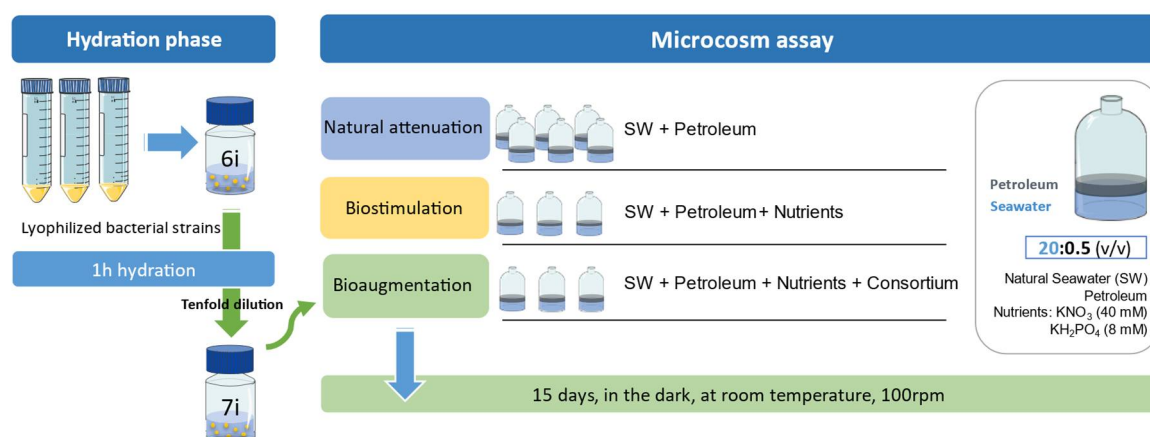

**Figure S4.** Representative scheme of the microcosms experiments with natural seawater (SW), petroleum and the optimum concentration of the consortium of lyophilized strains 7i ( $1.7 \cdot 10^{-1} \text{ g L}^{-1}$ ), with the treatments natural attenuation, bioaugmentation and bioaugmentation.

**Table S1.** Phylogenetic identification of bacterial strains isolated in the microcosms bioremediation experiment for the natural seawater at T0 (0SW) and for the different treatments: natural attenuation (NA) and biostimulation (BS) at T15, and bioaugmentation (BA) at T0, T7 and T15.

| Isolates            | Closest Identification             | Sequence length | % similarity* | Class               | Accession number |
|---------------------|------------------------------------|-----------------|---------------|---------------------|------------------|
| 1.7 L               | <i>Pseudomonas</i> sp.             | 1407            | 99.86         | Gammaproteobacteria | OK482776         |
| 0SW_A               | <i>Enterovibrio</i> sp.            | 1392            | 99.64         | Gammaproteobacteria | MW486132         |
| 0SW_B               | Rhodobacteraceae**                 | 1333            | 99.63         | Alphaproteobacteria | MW486149         |
| 0SW_C               | <i>Winogradskyella multivorans</i> | 1365            | 99.71         | Flavobacteriia      | MW486161         |
| 0BA_A <sup>a</sup>  | <i>Rhodococcus erythropolis</i>    | 1386            | 99.93         | Actinobacteria      | MW486151         |
| 0BA_B <sup>a</sup>  | <i>Pseudomonas</i> sp.             | 1408            | 99.86         | Gammaproteobacteria | MW486147         |
| 7BA_A               | <i>Pseudomonas oleovorans</i>      | 1409            | 99.79         | Gammaproteobacteria | MW486144         |
| 7BA_B               | Rhodobacteraceae**                 | 1335            | 99.10         | Alphaproteobacteria | MW486150         |
| 7BA_C               | <i>Pseudomonas pachastrellae</i>   | 1412            | 99.86         | Gammaproteobacteria | MW486146         |
| 7BA_D               | <i>Maribacter thermophilus</i>     | 1401            | 99.29         | Flavobacteriia      | MW486135         |
| 7BA_F               | <i>Vibrio alginolyticus</i>        | 1426            | 99.86         | Gammaproteobacteria | MW486158         |
| 7BA_G               | <i>Maribacter thermophilus</i>     | 1404            | 99.07         | Flavobacteriia      | MW486136         |
| 7BA_H               | <i>Vibrio tritonius</i>            | 1374            | 99.71         | Gammaproteobacteria | MW486160         |
| 7BA_I               | <i>Pseudoalteromonas</i> sp.       | 1404            | 99.93         | Gammaproteobacteria | MW486141         |
| 7BA_J               | <i>Shewanella</i> sp.              | 1415            | 99.72         | Gammaproteobacteria | MW486156         |
| 15NA_A              | <i>Sediminicola luteus</i>         | 1389            | 98.78         | Flavobacteriia      | MW486153         |
| 15NA_B              | <i>Sulfitobacter pontiacus</i>     | 1335            | 99.78         | Alphaproteobacteria | MW486157         |
| 15NA_C              | <i>Alteromonas</i> sp.             | 1408            | 99.57         | Gammaproteobacteria | MW486130         |
| 15NA_D              | <i>Alteromonas</i> sp.             | 1404            | 99.64         | Gammaproteobacteria | MW486131         |
| 15NA_E              | <i>Paraglaciicola mesophila</i> .  | 1401            | 99.57         | Gammaproteobacteria | MW486140         |
| 15NA_F              | <i>Idiomarina</i> sp.              | 1416            | 99.79         | Gammaproteobacteria | MW486133         |
| 15BS_A              | <i>Neptunomonas phycophila</i>     | 1410            | 99.72         | Gammaproteobacteria | MW486138         |
| 15BS_B              | <i>Pseudomonas marincola</i>       | 1399            | 99.86         | Gammaproteobacteria | MW486142         |
| 15BS_C              | <i>Pseudomonas pachastrellae</i>   | 1410            | 99.79         | Gammaproteobacteria | MW486145         |
| 15BS_D              | <i>Shewanella</i> sp.              | 1417            | 99.58         | Gammaproteobacteria | MW486155         |
| 15BS_F              | <i>Pseudomonas marincola</i>       | 1413            | 99.79         | Gammaproteobacteria | MW486143         |
| 15BA_A <sup>a</sup> | <i>Rhodococcus erythropolis</i>    | 1391            | 99,86         | Actinobacteria      | MW486152         |
| 15BA_B              | <i>Shewanella</i> sp.              | 1418            | 99,58         | Gammaproteobacteria | MW486154         |
| 15BA_C              | <i>Maribacter thermophilus</i>     | 1405            | 98,93         | Flavobacteriia      | MW486134         |
| 15BA_D <sup>a</sup> | <i>Pseudomonas oleovorans</i>      | 1406            | 99,79         | Gammaproteobacteria | MW486144         |
| 15BA_E              | <i>Microbacterium paraoxydans</i>  | 1391            | 99,93         | Actinobacteria      | MW486137         |
| 15BA_F              | <i>Paracoccus seriniphilus</i>     | 1337            | 99,63         | Alphaproteobacteria | MW486139         |
| 15BA_G              | <i>Vibrio</i> sp.                  | 1402            | 99,86         | Gammaproteobacteria | MW486159         |

\* similarity percentages according to the nucleotide collection database of the NCBI; \*\* the identification of the isolates was made only until the family level; <sup>a</sup> isolate similar to the introduced lyophilized bacterial strains (CPN2, CPN3 and 1.7L) used as inocula for the bioaugmentation treatments.
